# Supplementary material
Source: PubMed Central journal article supplement (PMC6393914)
Supplement: NIHMS1003618-supplement-Supplement.pdf [file NIHMS1003618-supplement-Supplement.pdf]

## Supplementary Online Content

Ogden CL, Fryar CD, Hales CM, Carroll MD, Aoki Y, Freedman DS. Differences in obesity prevalence by demographics and urbanization in US children and adolescents, 2013-2016. *JAMA*. doi:10.1001/jama.2018.5158

**eTable 1.** Unweighted Number of Persons With Obesity or Severe Obesity by Age, Sex, Education of Household Head, Race and Hispanic Origin: NHANES 2013-2016

**eTable 2.** Unweighted Number of Persons With Obesity and Severe Obesity by Urbanization and Survey Period: NHANES, 2001-2004 to 2015-2016

**eFigure 1.** Prevalence of Obesity and 95% CIs by Urbanization Category, Youth 2-19 Years, United States, 2001-2004 Through 2013-2016

**eFigure 2.** Prevalence of Severe Obesity and 95% CIs by Urbanization Category, Youth 2-19 Years, United States, 2001-2004 Through 2013-2016

This supplementary material has been provided by the authors to give readers additional information about their work.

**eTable 1. Unweighted number of persons with obesity or severe obesity by age, sex, education of household head, and race and Hispanic origin: NHANES 2013-2016**

|                                   |  | Race and Hispanic origin, No. of participants b |              |       |       |          |
|-----------------------------------|--|-------------------------------------------------|--------------|-------|-------|----------|
|                                   |  | All groups <sup>a</sup>                         | Non-Hispanic |       |       | Hispanic |
|                                   |  |                                                 | white        | black | Asian |          |
| <b>Obesity<sup>b</sup></b>        |  |                                                 |              |       |       |          |
| <b>All</b>                        |  | 1281                                            | 271          | 323   | 61    | 541      |
| Age, y                            |  |                                                 |              |       |       |          |
| 2-5                               |  | 203                                             | 47           | 48    | 10    | 85       |
| 6-11                              |  | 511                                             | 101          | 122   | 26    | 226      |
| 12-19                             |  | 567                                             | 123          | 153   | 25    | 230      |
| Sex                               |  |                                                 |              |       |       |          |
| Male                              |  |                                                 |              |       |       |          |
| 2-19 (overall)                    |  | 655                                             | 149          | 150   | 39    | 272      |
| 2-5                               |  | 107                                             | 23           | 26    | 7     | 43       |
| 6-11                              |  | 266                                             | 63           | 50    | 19    | 114      |
| 12-19                             |  | 282                                             | 63           | 74    | 13    | 115      |
| Female                            |  |                                                 |              |       |       |          |
| 2-19 (overall)                    |  | 626                                             | 122          | 173   | 22    | 269      |
| 2-5                               |  | 96                                              | 24           | 22    | 3     | 42       |
| 6-11                              |  | 245                                             | 38           | 72    | 7     | 112      |
| 12-19                             |  | 285                                             | 60           | 79    | 12    | 115      |
| Education of household head       |  |                                                 |              |       |       |          |
| High school diploma or less       |  | 695                                             | 104          | 138   | 22    | 394      |
| Some college                      |  | 389                                             | 97           | 133   | 19    | 107      |
| College graduate                  |  | 163                                             | 61           | 46    | 18    | 23       |
| <b>Severe obesity<sup>c</sup></b> |  |                                                 |              |       |       |          |
| <b>All</b>                        |  | 420                                             | 81           | 120   | 8     | 187      |
| Age, y                            |  |                                                 |              |       |       |          |
| 2-5                               |  | 30                                              | 5            | 8     | 0     | 14       |
| 6-11                              |  | 153                                             | 24           | 41    | 5     | 72       |
| 12-19                             |  | 237                                             | 52           | 71    | 3     | 101      |
| Sex                               |  |                                                 |              |       |       |          |
| Male                              |  |                                                 |              |       |       |          |
| 2-19 (overall)                    |  | 220                                             | 40           | 58    | 6     | 105      |
| 2-5                               |  | 15                                              | 1            | 6     | 0     | 7        |
| 6-11                              |  | 74                                              | 13           | 14    | 3     | 40       |
| 12-19                             |  | 131                                             | 26           | 38    | 3     | 58       |
| Female                            |  |                                                 |              |       |       |          |
| 2-19 (overall)                    |  | 200                                             | 41           | 62    | 2     | 82       |
| 2-5                               |  | 15                                              | 4            | 2     | 0     | 7        |

|                             |                             |     |    |    |   |     |
|-----------------------------|-----------------------------|-----|----|----|---|-----|
|                             | 6-11                        | 79  | 11 | 27 | 2 | 32  |
|                             | 12-19                       | 106 | 26 | 33 | 0 | 43  |
| Education of household head |                             |     |    |    |   |     |
|                             | High school diploma or less | 239 | 29 | 59 | 3 | 136 |
|                             | Some college                | 131 | 35 | 46 | 2 | 41  |
|                             | College graduate            | 44  | 17 | 14 | 2 | 6   |

---

Abbreviation: NHANES, National Health and Nutrition Examination Surveys

a. Includes race and Hispanic origin groups not shown separately

b. Obesity was defined as a BMI at or above the 95th percentile of BMI-for-age

d. Severe obesity was defined as BMI at or above 120% of the 95th percentile of BMI-for-age

**eTable 2. Unweighted number of persons with obesity and severe obesity by urbanization and survey period: NHANES, 2001-2004 to 2015-2016**

|                                   | 2001-2004 | 2005-2008 | 2009-2012 | 2013-2016 |
|-----------------------------------|-----------|-----------|-----------|-----------|
| <b>Obesity<sup>a</sup></b>        |           |           |           |           |
| Large MSA                         | 723       | 894       | 679       | 701       |
| Medium or Small MSA               | 495       | 298       | 322       | 372       |
| Non-MSA                           | 230       | 213       | 227       | 208       |
| <b>Severe Obesity<sup>b</sup></b> |           |           |           |           |
| Large MSA                         | 248       | 300       | 211       | 214       |
| Medium or Small MSA               | 174       | 85        | 126       | 119       |
| Non-MSA                           | 76        | 81        | 89        | 87        |

Abbreviations: NHANES, National Health and Nutrition Examination Survey; MSA, metropolitan statistical area

a. Obesity was defined as a BMI at or above the 95th percentile of BMI-for-age

b. Severe obesity was defined as BMI at or above 120% of the 95th percentile of BMI-for-age

**eFigure 1. Prevalence of obesity<sup>a</sup> and 95% confidence intervals by urbanization category, youth 2-19 years, United States, 2001-2004 through 2013-2016<sup>b</sup>**

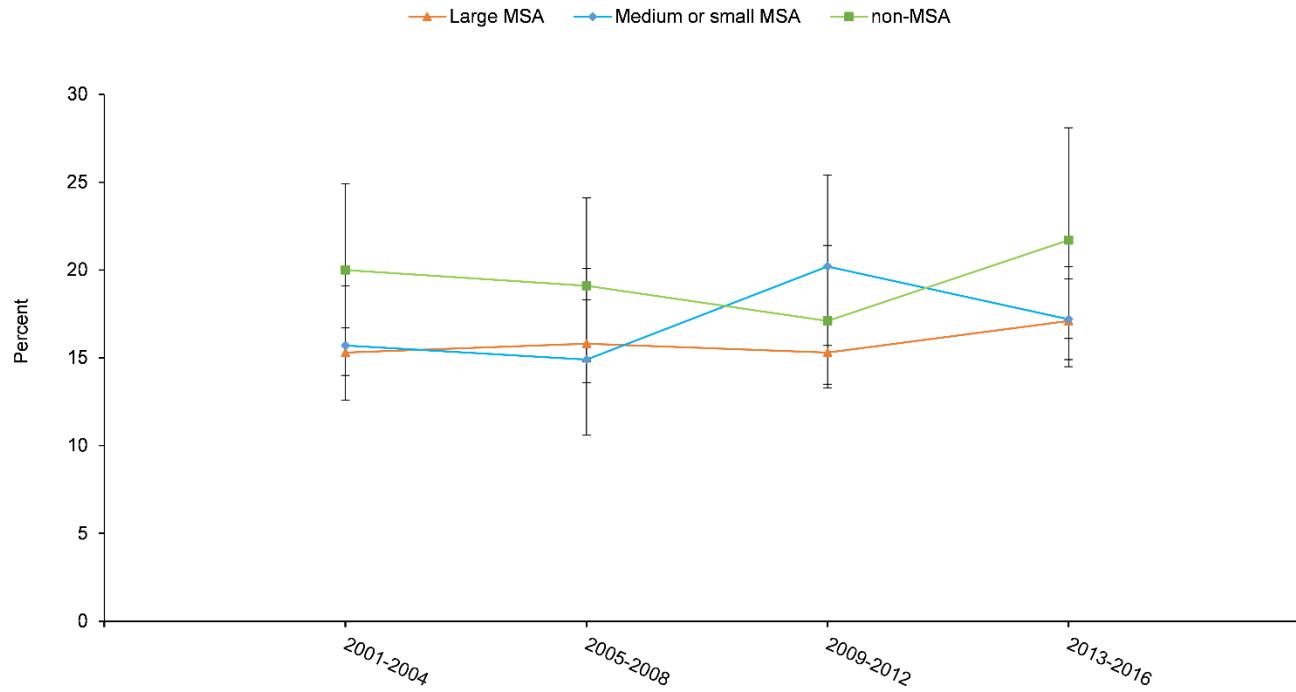

Abbreviation: MSA, metropolitan statistical area

<sup>a</sup>Obesity defined as at or above the sex specific 95<sup>th</sup> percentile of BMI-for-age CDC growth charts

<sup>b</sup>X-axis represents midpoint of survey period

Source: NCHS, National Health and Nutrition Examination Survey; estimates are weighted

**eFigure 2. Prevalence of severe obesity<sup>a</sup> and 95% confidence intervals by urbanization category, youth 2-19 years, US, 2001-2004 through 2013-2016<sup>b</sup>**

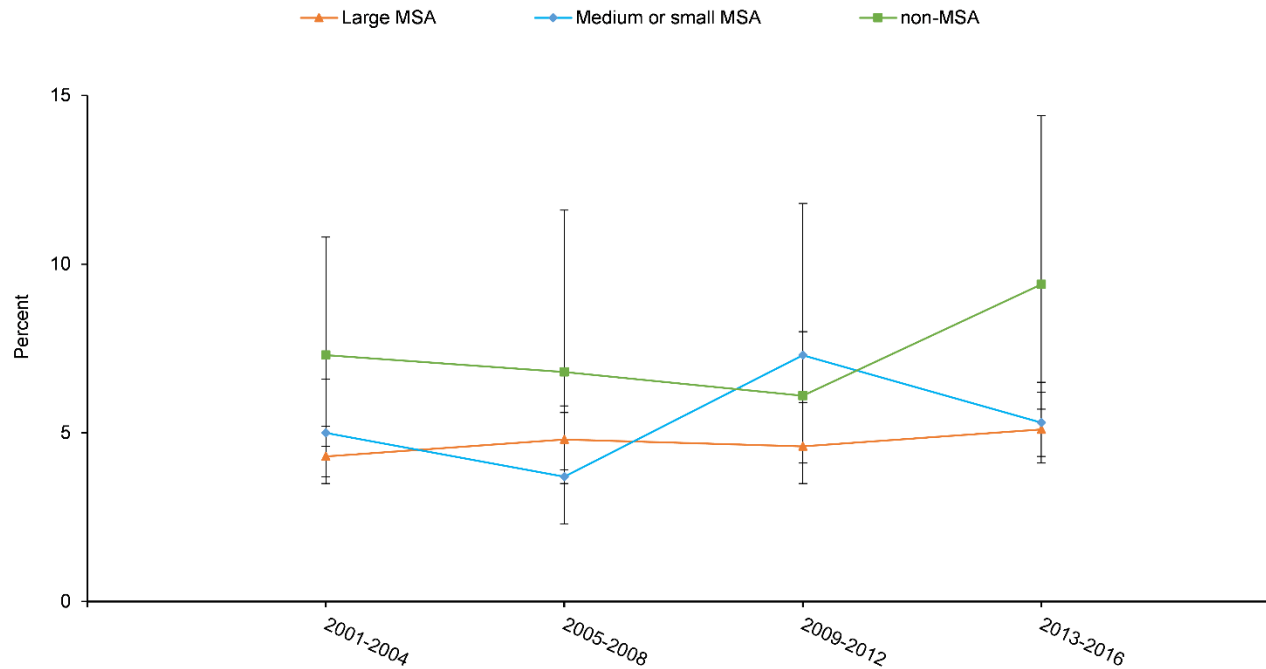

Abbreviation: MSA, metropolitan statistical area

<sup>a</sup>Severe obesity defined as 120% of the sex specific 95<sup>th</sup> percentile of BMI-for-age CDC growth charts

<sup>b</sup>X-axis represents midpoint of survey period

Source: NCHS, National Health and Nutrition Examination Survey; estimates are weighted
